# Supplementary material for: Intersectional Stigma, Identity, and Culture: A Grounded Theory of Female Escort Perspectives from Brazil and Pakistan
Source: Preprints.org preprint supplement (doi:10.20944/preprints202009.0329.v1), 2020-09-15
Supplement: Supplementary file 1 [file supplementary]

Figure 2 : Management of Identity

| Core Experience of Management of Identity:  Living a double life. | |
| --- | --- |
| Category | Properties |
| Concealment of identity  Different Persona  Process of Change | “…work with a different name”  “It’s not me, it’s a persona”  “You need time to switch like putting your make-up on” |
