# Supplementary material for: Intersectional Stigma, Identity, and Culture: A Grounded Theory of Female Escort Perspectives from Brazil and Pakistan
Source: Preprints.org preprint supplement (doi:10.20944/preprints202009.0329.v1), 2020-09-15
Supplement: Supplementary file 2 [file Figure 1 Demographics.docx]

Figure 1: Demographics of interview sample

| NAME AGE ETHINICTY RELATIONSHIP CHILDREN TIME WORKING  STATUS |
| --- |
| Anna 27 Brazilian Single None 3 years  Tanya 36 Mixed Brazilian Married One (aged 12) 6 years  Cara 24 Asian Pakistani Single None 2 years  Maria 26 Asian Pakistani Single One (aged 4) 8 years  Priya 23 Asian Pakistani Single None 2 years  Linda 37 White English Single None 14 years  Sophie 28 White English Single None 10 years |
