# Supplementary material for: Intersectional Stigma, Identity, and Culture: A Grounded Theory of Female Escort Perspectives from Brazil and Pakistan
Source: Preprints.org preprint supplement (doi:10.20944/preprints202009.0329.v1), 2020-09-15
Supplement: Supplementary file 4 [file Figure 3 Impact of Stigma.docx]

Figure 3: Impact of Stigma

| Core Experience of Impact of Stigma:  Loneliness | |
| --- | --- |
| Category | Properties |
| Lack of Disclosure  Shame and Guilt | “ I say I’m a babysitter outside London”  “this is the negative side, it make me feel like guilt, make me feel dirt” |
